# Supplementary material for: High-Throughput In Vitro Gene Expression Profile to Screen of Natural Herbals for Breast Cancer Treatment
Source: Frontiers journal article supplement (doi:10.3389/fonc.2021.684351), 2021-08-13
Supplement: Table_6.xlsx [file Table_6.xlsx]

## Sheet: Sheet1
Supplemental Table 6 Pathway results of traditional Chinese medicine and positive control
Treat	Extraction method	Sample name	Family	Genus	Pharmaceutical effect	Description	pvalue	p.adjust	qvalue	geneID	Count
Treat58	S008	Excoecaria cochinchinensisLour.	Euphorbiaceae	Excoecaria	Rheumatism treatment	TNF signaling pathway	1.95e-06	0.000607596	0.00049813	3383/7128/3976/5602/5608/3659/4792/330/7187/1051/6376/9021/8503/3569/4318/4217/148327/3726/9020/1435/7424/257397/6364	23
						Axon guidance	7.08e-06	0.00110502	0.000905934	6469/6387/27289/2051/59277/8482/7225/1969/10509/2045/57556/8829/1942/4776/6405/2048/7474/56896/56920/5578/90249/816/8503/8633/5727/3688/64101/7869/2534/5362	30
						Complement and coagulation cascades	1.63e-05	0.00150041	0.0012301	7056/5329/716/7035/3684/5328/2149/2157/2155/2/629/727/5265/5327/2244/5054/2153/7450	18
						IL-17 signaling pathway	1.92e-05	0.00150041	0.0012301	3576/4322/7128/8061/5602/55540/4586/4792/6280/7187/1051/27189/3569/4318/6278/5597/257397/1440/6364	19
						Retinol metabolism	5.96e-05	0.00329315	0.00269985	1543/220/157506/7366/195814/9249/51109/54578/316/317749/7367/728635/54577/53630/112724	15
						Amoebiasis	6.33e-05	0.00329315	0.00269985	3576/3918/7043/7040/107/3684/87/3914/7097/5272/5578/8503/3569/1281/3909/1288/3915/929/2335	19
						Ferroptosis	7.67e-05	0.00341861	0.0028027	64116/23657/2730/5621/2495/2180/2729/6303/4891/1356/7037	11
						Cytokine-cytokine receptor interaction	0.000144357	0.00527234	0.00432246	27242/3459/3576/6387/9173/3624/4982/57007/3589/2690/3976/23529/3566/7043/51330/55540/9180/3460/7040/653/8797/6376/9518/27189/3569/654/353500/8744/3601/6367/8741/3556/8795/1230/1235/1435/1440/6364	38
						AGE-RAGE signaling pathway in diabetic complications	0.000155279	0.00527234	0.00432246	3576/3383/7056/4088/7043/5602/7422/7040/5578/2308/8503/3569/1281/1288/7424/84812/5054/2335	18
						Small cell lung cancer	0.000168985	0.00527234	0.00432246	3918/1870/4792/330/3673/3914/7187/1869/8503/3685/3674/3909/3688/1288/1026/3915/2335	17
						PI3K-Akt signaling pathway	0.000205097	0.0058173	0.00476924	374/10161/3918/2690/3566/1969/23678/3678/3164/9180/3694/3693/7422/29941/1956/1942/3673/8817/3914/7097/5526/2149/2790/5578/8503/3569/3685/3674/148327/7039/3909/3688/2324/1288/1026/3915/627/1435/7424/1440/5563/7450/2335	43
						FoxO signaling pathway	0.000249326	0.00648248	0.00531458	6648/4088/23678/7043/5602/7040/1263/1956/114907/100132074/5347/2308/8503/3569/1026/901/23710/6517/664/5563/102800317	21
						ECM-receptor interaction	0.000316374	0.00759297	0.00622501	3918/3678/3694/960/3693/3673/3914/3685/3674/3909/3688/1288/3915/9899/7450/2335	16
						Proteoglycans in cancer	0.000414864	0.00916235	0.00751164	6469/5329/286/3678/1514/960/3693/7422/7023/7040/27250/1839/1956/3673/5328/7097/2316/7474/5578/816/8503/4318/5727/3685/10855/3688/1026/2335	28
						Cellular senescence	0.000451784	0.00916235	0.00751164	3576/1870/4088/824/7043/5608/7040/3364/2305/4776/144715/8878/2626/3486/1869/2308/8503/3569/1026/3106/8900/59341/5054	23
						HIF-1 signaling pathway	0.000469864	0.00916235	0.00751164	3459/112399/3099/3460/7422/1956/3939/54583/5578/5214/816/8503/3569/7076/1026/7037/5054/5230	18
						MAPK signaling pathway	0.000576024	0.0104334	0.0085537	374/1846/5971/1969/1848/7043/5602/5608/3164/3306/4791/7422/7040/1844/1956/1942/8817/3925/6197/5871/1847/27092/2316/5578/80824/4217/7039/3556/2324/9448/25780/627/9020/1435/7424/929	36
						Rheumatoid arthritis	0.000601927	0.0104334	0.0085537	3576/6387/3383/3589/7043/1514/7422/7040/7097/525/50617/3569/8741/1435/245973/6364	16
						Focal adhesion	0.00068105	0.0111836	0.00916871	3918/824/5602/3678/3694/3693/7422/1956/330/3673/87/3914/2316/5578/8503/3685/3674/3909/3688/2324/1288/3915/399694/7424/2534/7450/2335	27
						Prostate cancer	0.000967744	0.0150968	0.0123769	1870/4792/1956/83439/5328/2119/1869/2308/8503/4318/148327/7039/4824/1026/5327/2078	16
						Osteoclast differentiation	0.00127186	0.0188962	0.0154919	3459/4982/8061/5971/5602/5608/4791/3460/4792/7040/5468/8878/9021/8503/29760/3726/9020/1435/2534	19
						Transcriptional misregulation in cancer	0.00166207	0.0225693	0.0185031	3576/860/3398/1848/1031/3248/3684/330/5468/5328/4094/85414/1051/2119/3486/2118/2308/3569/4318/4613/1026/5327/2078/8900/929	25
						Bladder cancer	0.00166376	0.0225693	0.0185031	3576/1870/7422/1839/1956/23604/1869/4318/1026	9
						Hepatitis B	0.00180543	0.0234706	0.0192421	3576/1870/4088/7043/5602/5608/4792/7040/1959/2185/4776/7097/7187/5578/1869/8503/3569/4318/332/148327/1026/8900	22
						NF-kappa B signaling pathway	0.00206076	0.0257183	0.0210849	3576/6387/3383/7128/128178/5971/4791/4792/330/5328/7187/29760/4067/9020/257397/929	16
						Human T-cell leukemia virus 1 infection	0.00247078	0.0296493	0.0243076	3383/1870/4088/2114/8061/5971/7043/5602/1031/4791/4792/7040/8829/107/1959/4776/1869/5423/8503/3569/3601/148327/991/1026/3106/8900/9020	27
						Steroid hormone biosynthesis	0.00285635	0.0330067	0.0270601	1645/1543/1545/3283/1646/79644/7366/54578/7367/54577/8644	11
						ABC transporters	0.00328264	0.036578	0.029988	8714/9429/6833/20/5243/10257/24/19/368	9
Treat73	S138	Breynia fruticosa	Euphorbiaceae	Breynia	Rheumatism treatment	TNF signaling pathway	6.65e-07	0.000172634	0.000134085	3383/5608/3659/3976/4792/5602/7128/330/5295/840/1435/1051/6376/1906/7187/4217/148327/4318/6364/9020/3569/83737/257397/6347	24
						Small cell lung cancer	1.12e-06	0.000172634	0.000134085	1870/3918/4792/3909/330/3914/5295/3673/3674/6502/7187/1643/9618/3685/1647/1869/3915/3688/2335/1026/2272	21
						MAPK signaling pathway	7.29e-06	0.000751224	0.000583475	374/1846/5608/1969/25780/5971/3164/4137/5602/3815/7043/6196/2261/1848/7040/3306/3925/4791/1435/59285/929/27092/1944/80824/9064/9254/6197/1847/4217/408/7422/5578/1956/1946/9020/2324/1647/3643/1950/8911/27330/4909	42
						Complement and coagulation cascades	1.97e-05	0.00131779	0.00102352	7056/7035/716/2149/5328/1604/5329/5265/2157/727/5327/2244/2/629/623/3684/5054/7450	18
						IL-17 signaling pathway	2.35e-05	0.00131779	0.00102352	4322/3576/8061/55540/4792/5602/6280/7128/4586/1051/7187/9618/4318/6364/3569/225689/257397/6347/3934	19
						Axon guidance	2.56e-05	0.00131779	0.00102352	6469/27289/59277/6387/2051/7225/1969/8482/2045/8829/816/7474/5295/57556/285220/2041/6405/56896/1944/9037/64101/56920/5578/1946/2534/3688/6585/4776/5727	29
						Proteoglycans in cancer	3.88e-05	0.00171316	0.00133061	6469/3693/1514/960/286/5328/816/7474/1839/7040/27250/7855/5295/3673/5329/2099/8321/10855/7422/4318/3685/3678/5578/1956/7078/7483/3688/7097/2335/1026/5727	31
						ABC transporters	4.46e-05	0.00172256	0.00133791	8714/9429/19/20/24/6833/10257/368/6891/5244/10058/6890	12
						Ferroptosis	8.72e-05	0.00269426	0.00209263	64116/23657/2730/5621/1356/6303/4891/2495/3162/2180/6520	11
						Bladder cancer	8.72e-05	0.00269426	0.00209263	3576/1870/2261/23604/1839/7422/4318/1956/1869/1026/1950	11
						Prostate cancer	0.00012387	0.00347963	0.00270263	1870/4824/4792/5328/2119/5295/2308/148327/4318/83439/5327/1956/51176/1869/1026/7113/1950/6932	18
						Pancreatic cancer	0.000221593	0.00545374	0.00423592	1870/4088/5602/5337/7043/7040/5295/1643/7422/1956/1647/5888/1869/1026/1950	15
						Rheumatoid arthritis	0.000229445	0.00545374	0.00423592	3383/3576/6387/3589/1514/7043/7040/1435/525/7422/3606/6364/8741/3569/7097/6347/245972	17
						Colorectal cancer	0.000282438	0.00622805	0.00483732	374/4088/5602/8313/7043/7040/5295/1643/332/83439/1956/1647/51176/1026/1950/6932	16
						FoxO signaling pathway	0.000302333	0.00622805	0.00483732	6648/4088/114907/5602/7043/7040/100132074/23678/5295/6502/9133/2308/1263/1956/10733/3569/1647/23710/1026/3643/1950	21
						Basal cell carcinoma	0.000365015	0.00665315	0.0051675	6469/8313/7474/7855/1643/8321/83439/1647/51176/7483/1026/5727/6932	13
						Cell cycle	0.000384942	0.00665315	0.0051675	4171/1870/4088/1031/7043/7040/8318/6502/9133/9700/991/995/9088/1028/1875/5111/1647/1869/8555/1026	20
						Hepatitis B	0.000391272	0.00665315	0.0051675	3576/5608/1870/4088/2185/4792/5602/7043/7040/5295/7187/1643/1959/148327/4318/332/5111/5578/1960/3569/1869/7097/4776/1026	24
						Transcriptional misregulation in cancer	0.000409094	0.00665315	0.0051675	3576/860/1031/5468/4094/3248/5328/1848/2119/330/2118/8355/1051/85414/929/2308/1643/4613/5090/4318/5327/3569/1647/1026/7113/3684/4286	27
						HIF-1 signaling pathway	0.000556256	0.00859415	0.00667507	3459/3460/112399/816/3099/5295/1906/7422/5578/1956/230/7076/3569/3162/1026/3643/1950/5054	18
						Breast cancer	0.000586618	0.00863167	0.00670421	1870/54567/4041/8313/3815/7474/7855/4791/5295/2099/1643/8321/83439/1956/2324/1647/51176/1869/7483/1026/1950/6932	22
						Hepatocellular carcinoma	0.000671458	0.00943093	0.00732499	1870/4088/7296/4041/8313/7043/7474/7040/7855/5295/4257/1643/8321/1728/83439/5578/1956/1647/51176/1869/7483/3162/1026/6932	24
						Arrhythmogenic right ventricular cardiomyopathy	0.000849667	0.0114151	0.00886609	3693/3694/3673/3674/59285/27092/9254/3685/83439/6445/3678/51176/3688/6932	14
						PI3K-Akt signaling pathway	0.00101719	0.0130963	0.0101719	374/10161/3918/1969/3693/3164/3694/3566/3815/2149/2261/29941/3909/9180/3914/23678/5295/1435/3673/3674/1944/2790/1291/148327/7422/3685/3678/5578/1956/1946/2324/3569/3915/3688/7097/2335/1026/3643/1950/4909/7450	41
						ECM-receptor interaction	0.00112744	0.0139352	0.0108234	3918/3693/3694/960/3909/3914/3673/3674/1291/3685/3678/3915/3688/2335/7450	15
						Cushing syndrome	0.00120996	0.0143799	0.0111689	51655/3283/1870/107/1031/3164/8313/816/7474/7855/8321/57552/148327/83439/1956/51176/1869/7483/196/1026/8911/6932	22
						Hypertrophic cardiomyopathy	0.00142778	0.0163402	0.0126914	3693/3694/7043/7040/3673/3674/59285/27092/1906/9254/3685/6445/3678/3569/3688	15
						Cytokine-cytokine receptor interaction	0.00154462	0.0167062	0.0129757	27242/3459/9173/3576/6387/57007/55540/3624/3460/23529/3589/8797/3976/3566/6367/51330/4982/7043/7040/9180/9518/1435/653/3557/3601/6376/8744/3606/6364/8741/3569/1235/353500/268/6347	35
						AGE-RAGE signaling pathway in diabetic complications	0.00156789	0.0167062	0.0129757	3383/3576/7056/4088/5602/7043/7040/5295/1906/2308/7422/5578/3569/2335/5054/6347	16
						Gastric cancer	0.00169539	0.0174625	0.0135631	6469/1870/4088/4041/8313/7043/7474/7040/7855/5295/1643/8321/83439/1956/1647/51176/1869/7483/1026/1950/6932	21
						Amoebiasis	0.00193835	0.019321	0.0150066	3576/3918/107/7043/3909/7040/5272/3914/5295/929/5578/3569/3915/7097/2335/3684	16
						Parathyroid hormone synthesis, secretion and action	0.00290078	0.027373	0.0212606	4322/860/7421/107/9935/4041/5337/1839/9368/408/148327/1591/5578/1956/64386/1026	16
						Cellular senescence	0.00299905	0.027373	0.0212606	3576/5608/1870/4088/824/8878/7043/7040/2626/5295/9133/2308/1875/144715/59341/3569/1647/1869/4776/1026/5054	21
						Human T-cell leukemia virus 1 infection	0.00301191	0.027373	0.0212606	3383/1870/4088/8061/5971/107/1031/2114/4792/5602/8829/7043/7040/4791/5295/3601/9133/9700/5423/991/1959/148327/9020/3569/1869/4776/1026	27
						Steroid hormone biosynthesis	0.00318775	0.0278155	0.0216042	1645/3283/1646/1545/1543/79644/54578/7366/7367/8644/54577	11
						Hippo signaling pathway	0.00324064	0.0278155	0.0216042	374/4088/7161/8313/7043/7474/7040/330/7855/653/8321/3397/332/83439/51176/7483/353500/268/6591/5054/6932	21
						Rap1 signaling pathway	0.00336723	0.0281209	0.0218415	51466/5608/1969/25780/107/9771/3815/2149/2261/2902/5295/1435/3674/136/1944/7422/3397/5578/2533/1956/1946/2324/3688/3643/3684/1950	26
						Thyroid cancer	0.00360474	0.0286658	0.0222647	5979/5468/1643/83439/1647/51176/1026/6932	8
						Osteoclast differentiation	0.00361801	0.0286658	0.0222647	3459/5608/8061/3460/5971/799/5468/4792/5602/8878/4982/7040/4791/5295/1435/9020/2534/4286	18
						Fluid shear stress and atherosclerosis	0.00391252	0.0302242	0.0234751	3383/5608/7056/1514/5602/8878/5295/3674/4257/1906/4217/1728/7422/4318/3685/5327/59341/3162/6347	19
						Epstein-Barr virus infection	0.00401773	0.03028	0.0235184	3383/5608/956/1870/5971/7431/960/4792/5602/7128/4791/5295/6502/5706/377841/7187/1643/9020/3569/6891/1647/1869/7097/6890/1026	25
						p53 signaling pathway	0.00466211	0.0342998	0.0266406	7161/83667/8797/6241/84883/9133/1643/51512/1647/1026/575/5054	12
						Legionellosis	0.00592038	0.0401395	0.0311763	3576/4792/3306/4791/840/929/3606/3569/7097/3684	10
						Mucin type O-glycan biosynthesis	0.00594835	0.0401395	0.0311763	6482/51301/55568/2590/79623/442117/9245	7
						NF-kappa B signaling pathway	0.00597546	0.0401395	0.0311763	3383/3576/6387/128178/5971/4792/5328/7128/330/4791/929/7187/9020/1647/257397	15
						C-type lectin receptor signaling pathway	0.00597546	0.0401395	0.0311763	5971/3659/4792/5602/6367/4791/5295/1959/1263/1960/9020/3569/64581/4776/8844	15
						Endometrial cancer	0.00671559	0.0441514	0.0342924	8313/5295/1643/83439/1956/1647/51176/1026/1950/6932	10
						Dilated cardiomyopathy	0.00704894	0.0453776	0.0352447	3693/107/3694/7043/7040/3673/3674/59285/27092/9254/3685/6445/3678/3688	14
						Focal adhesion	0.00745004	0.0469809	0.03649	3918/3693/824/3694/5602/3909/330/3914/5295/3673/3674/1291/7422/3685/3678/5578/1956/2324/2534/3915/3688/2335/1950/7450	24
Treat27	S174	Ricinus communis L.	Euphorbiaceae	Ricinus	Unclassified	Cell cycle	9.44e-07	0.0002936	0.0002385	4171/1870/8318/7043/990/4088/4176/1031/4172/993/4085/1869/4173/4174/5111/9088/8317/6502/1647/4616/5347/1875/8555	23
						Ferroptosis	1.93e-05	0.00258363	0.00209873	64116/23657/2730/3162/2729/2495/2180/5621/2512/6303/6520	11
						Axon guidance	2.81e-05	0.00258363	0.00209873	6387/6469/27289/57556/59277/2045/90249/8633/1969/2051/56896/3897/2042/7474/816/8482/8829/80031/285220/5578/6405/1073/5727/64101/2534/4776	26
						DNA replication	3.32e-05	0.00258363	0.00209873	4171/3978/4176/4172/2237/4173/4174/5424/5427/5111	10
						ABC transporters	4.98e-05	0.00309558	0.0025146	8714/9429/368/6833/10257/10058/5243/19/6890/24/5244	11
						MAPK signaling pathway	6.69e-05	0.00346784	0.002817	374/1846/7043/5971/5608/3815/5602/1848/3306/4791/1969/8817/6196/1852/2317/7422/2261/2353/1844/1435/2264/6197/4137/1647/5578/1649/1847/4616/4217/8605/4909/1956/25780/7124/59285	35
						Small cell lung cancer	9.67e-05	0.00429681	0.00349038	1870/3918/4792/1869/330/1643/7187/3914/6502/1647/3909/4616/1282/3673/3685/1288	16
						IL-17 signaling pathway	0.00012598	0.00489755	0.00397838	55540/3576/7128/4322/8061/4792/5602/1051/2353/7187/4586/3569/5597/6280/225689/7124	16
						Cytokine-cytokine receptor interaction	0.00016103	0.00556458	0.00452022	27242/3459/6387/55540/2690/3576/3624/57007/7043/4982/3976/23529/653/3460/6367/9180/8797/51330/8744/1435/1235/6376/9518/654/9173/3589/8741/3601/353500/3569/1230/3570/7124/3606	34
						TNF signaling pathway	0.00032864	0.0102206	0.00830241	3383/7128/5608/3976/4792/5602/1051/3659/330/2353/1435/7187/6376/148327/3569/4217/7124	17
						Rheumatoid arthritis	0.00037434	0.0105837	0.00859738	6387/3383/3576/7043/1514/50617/7422/2353/1435/7097/3589/8741/3569/7124/3606	15
						ECM-receptor interaction	0.00067129	0.0173976	0.0141324	3918/3694/960/341640/3914/1291/3909/3678/1282/3673/7058/7450/3685/1288	14
						Epstein-Barr virus infection	0.00095321	0.0228038	0.018524	1870/3383/7128/5971/5608/7431/4792/5602/4791/1869/1643/960/7187/7097/6502/956/377841/1647/4067/4616/3569/6890/3106/7124	24
						NF-kappa B signaling pathway	0.00124687	0.0276984	0.0224999	6387/3383/3576/7128/5971/128178/4792/4791/5328/330/7187/1647/4067/4616/7124	15
						Hepatitis B	0.0015542	0.0322238	0.026176	1870/3576/7043/5608/4792/4088/5602/1869/1643/332/2353/5111/7187/7097/148327/1959/5578/3569/4776/7124	20
						Colorectal cancer	0.00167859	0.0326276	0.0265041	374/7043/4088/5602/83439/1643/332/2353/1647/4616/8313/51176/1956	13
						Antifolate resistance	0.00196806	0.036004	0.0292468	8714/9429/7298/1719/10257/3569/7124	7
						AGE-RAGE signaling pathway in diabetic complications	0.00238848	0.0399209	0.0324286	7056/3383/3576/7043/4088/5602/7422/5578/84812/3569/1282/5330/1288/7124	14
						Transcriptional misregulation in cancer	0.0024389	0.0399209	0.0324286	860/3576/4094/1031/1848/1051/2119/5328/330/5468/1643/3684/4613/1647/2118/1649/2078/3248/4616/3569/85414/7849	22
						Bladder cancer	0.00257186	0.0399924	0.0324867	1870/3576/1869/7422/2261/1839/23604/1956	8
						Amoebiasis	0.00288097	0.0407436	0.0330969	3576/3918/7043/3684/7097/3914/5578/5272/3909/3569/1282/5330/1288/7124	14
						Base excision repair	0.00288219	0.0407436	0.0330969	3978/2237/55247/7374/5424/5427/5111	7
Treat15	S095	Senecio scandens	Asteraceae	Senecio	Heat-Clearing	TNF signaling pathway	1.34523e-08	4.18366e-06	3.41263e-06	5608/3383/3659/7128/4792/3976/1051/330/840/1435/4217/148327/6376/7187/3726/6364/9020/3569/5602/4318/1906/3725/7124/1326/83737/257397	26
						Cell cycle	3.03978e-08	4.72686e-06	3.85572e-06	4171/1870/4088/4085/8318/7040/890/983/990/4172/7043/6502/9133/4173/5111/995/5347/1869/991/4174/1647/1875/8317/1028/1026/8555/1030	27
						IL-17 signaling pathway	2.79557e-06	0.000289808	0.000236398	3576/4322/55540/8061/7128/4792/6280/1051/7187/9618/6364/3569/5602/4318/4586/3725/225689/6278/7124/257397	20
						Rheumatoid arthritis	9.27363e-06	0.000678292	0.000553286	6387/3576/3383/7040/3589/1514/7043/7422/1435/3127/4050/6364/3569/3606/3725/7124/245972/525/245973	19
						MAPK signaling pathway	1.0905e-05	0.000678292	0.000553286	374/1846/5608/3164/5971/3815/1848/7040/2261/25780/6196/4137/4791/2317/7043/1649/1843/1847/1969/929/9254/7422/1435/2264/1852/1944/80824/59285/6197/4217/1647/9020/5602/5578/3725/10235/4909/7124/627/1326	40
						Human T-cell leukemia virus 1 infection	5.04586e-05	0.00261544	0.00213343	1870/3383/2114/107/4088/8061/5971/4792/4085/7040/890/4791/7043/115/1959/9133/3601/83660/3127/5423/1869/991/148327/9020/3569/5602/3725/1026/7124/3106/1030	31
						DNA replication	8.44924e-05	0.00359036	0.00292868	4171/3978/4172/5424/4173/5111/2237/23649/4174/5427	10
						Cellular senescence	9.57984e-05	0.00359036	0.00292868	3576/1870/5608/4088/824/8878/7040/890/983/7043/9133/2308/1869/2626/4605/1647/144715/1875/59341/3569/1026/5054/3106/1030	24
						Small cell lung cancer	0.000103901	0.00359036	0.00292868	1870/4792/3913/3918/3674/330/6502/1643/1869/3909/1647/7187/9618/3673/1026/3914/1030	17
						ABC transporters	0.000134011	0.00416775	0.00339965	8714/9429/20/6833/19/24/368/6891/9619/5244/10257	11
						Bladder cancer	0.000275192	0.00724614	0.00591071	3576/1870/2261/1839/23604/7422/1869/7057/4318/1026	10
						p53 signaling pathway	0.000279594	0.00724614	0.00591071	7161/6241/83667/84883/983/9133/8797/51512/1643/1647/7057/575/1026/5054	14
						Transcriptional misregulation in cancer	0.000411487	0.00922314	0.00752336	3576/860/3398/4094/3248/1848/5468/890/2119/1051/330/5328/1649/2118/929/85414/2308/3684/1643/4613/5090/1647/3569/4318/1026/5327	26
						TGF-beta signaling pathway	0.000438446	0.00922314	0.00752336	4088/3398/3624/7040/7043/353500/7050/4092/653/3400/3397/7057/1875/57154/7124/1030	16
						Hepatitis B	0.000444846	0.00922314	0.00752336	3576/1870/5608/4088/4792/7040/2185/890/332/7043/1959/5111/1643/1869/148327/7187/3569/5602/4318/5578/3725/1026/7124	23
						NF-kappa B signaling pathway	0.000479152	0.00931352	0.00759708	6387/3576/3383/128178/5971/7128/4792/4791/330/5328/929/1647/4050/7187/9020/7124/257397	17
						Cytokine-cytokine receptor interaction	0.000592622	0.0108415	0.00884346	27242/3459/6387/3576/9173/57007/55540/3976/23529/3460/3624/6367/4982/7040/3589/51330/3566/7043/9518/8797/3601/353500/1435/55504/653/3557/4050/6376/6364/3569/9180/3606/4352/7124/8744	35
						AGE-RAGE signaling pathway in diabetic complications	0.000886067	0.0153093	0.0124878	3576/3383/7056/4088/7040/7043/7422/2308/1281/3569/5602/5578/1906/3725/7124/5054	16
						Inflammatory bowel disease	0.00107189	0.0175451	0.0143116	3459/4088/4094/3460/7040/3566/7043/3127/3569/3606/3725/7124	12
						Apoptosis	0.00165437	0.0257255	0.0209844	4792/824/4001/1514/7277/332/330/1649/840/8797/1515/4217/1647/9020/5602/3725/2081/7124/5414	19
						ECM-receptor interaction	0.00193015	0.0272416	0.0222211	3913/3918/3674/960/3694/1291/3693/3691/3909/7057/80144/3673/3678/3914	14
						Epstein-Barr virus infection	0.001956	0.0272416	0.0222211	1870/5608/3383/7431/5971/956/7128/4792/890/960/4791/6502/3127/1643/1869/1647/7187/9020/3569/5602/3725/1026/6891/7124/3106	25
						Osteoclast differentiation	0.00201465	0.0272416	0.0222211	3459/5608/8061/5971/799/4792/3460/8878/4982/7040/5468/4791/1435/3726/9020/5602/3725/7124	18
						Fluid shear stress and atherosclerosis	0.00214021	0.0277335	0.0226224	5608/3383/7056/8878/1514/3674/1843/4257/7422/4217/1728/59341/5602/4318/1906/3725/7124/3162/5327	19
						Progesterone-mediated oocyte maturation	0.00246073	0.0306115	0.02497	5241/107/4085/6793/387778/890/6196/983/115/9133/995/5347/6197/5602/80315	15
						FoxO signaling pathway	0.00261476	0.0312766	0.0255125	6648/4088/114907/7040/23678/1263/7043/6502/9133/5347/2308/100132074/1647/3569/5602/1026/1030/102800317	18
						Amoebiasis	0.00299564	0.0345053	0.0281461	3576/107/3913/3918/7040/7043/929/3684/5272/3909/1281/3569/5578/7124/3914	15
						Rap1 signaling pathway	0.00332259	0.0369045	0.0301032	5608/51466/107/3815/9771/2261/25780/3674/2902/115/1969/136/83660/7422/1435/2264/1944/3684/2533/3397/7057/10411/5578/10235/57121	25
						Antifolate resistance	0.00366073	0.0392582	0.0320231	8714/9429/7298/1719/3569/7124/10257	7
Treat24	S125	Melia azedarach	Meliaceae	Melia	Heat-Clearing	Cell cycle	6.89e-12	2.11e-09	1.83e-09	4171/8318/1870/990/1647/1869/4176/4172/4085/4173/4175/4174/983/595/890/9088/1017/7043/993/5111/1031/10912/4998/1111/9133/11200/1030/7272/5347/991/699/6502	32
						DNA replication	1.78e-10	2.73e-08	2.36e-08	4171/3978/4176/4172/4173/4175/4174/2237/5427/5111/5424/5985/23649/5984/5426/5557	16
						Ferroptosis	1.05e-06	0.00010709	9.25e-05	3162/2730/23657/81631/2495/5621/64116/2512/643246/2729/6520/2180/6303	13
						p53 signaling pathway	2.99e-06	0.00022983	0.00019859	6241/7161/1647/983/595/84883/1017/10912/8797/1111/51512/9133/11200/83667/5268/8795/27113	17
						Cellular senescence	6.34e-05	0.00389123	0.00336221	1870/3576/8878/1647/1869/983/595/890/1017/7043/993/10912/5608/2626/1111/9133/11200/1030/207/2305/144715/824/59341/3569	24
						Antifolate resistance	0.00010761	0.00550597	0.00475743	9429/1719/7298/8714/7124/1244/4363/3569/10257	9
						TNF signaling pathway	0.0002967	0.0130124	0.0112434	7128/3383/4792/3659/5608/6364/3725/330/207/1051/1435/6347/1326/148327/7124/3976/3569/6376	18
						Human T-cell leukemia virus 1 infection	0.00042345	0.0159949	0.0138204	1870/5971/2114/3383/107/1869/4085/8061/595/890/4792/1017/7043/1031/3601/4791/1111/9133/11200/1030/3725/207/991/148327/7124/3569/7015/3689	28
						Apoptosis	0.00046891	0.0159949	0.0138204	1649/1647/4001/7277/4792/1514/10912/8797/332/84823/2081/3725/330/207/1515/824/8795/27113/7124/8739	20
						Fanconi anemia pathway	0.00058585	0.0169636	0.0146574	116028/2175/5888/146956/55215/641/91442/2177/2176/29089/378708	11
						Epstein-Barr virus infection	0.00060782	0.0169636	0.0146574	1870/7128/5971/3383/1647/1869/595/890/4792/1017/10912/5608/4791/5717/10213/5706/3725/207/5719/9861/5704/7124/6502/3569/956/6890	26
						Progesterone-mediated oocyte maturation	0.00066732	0.0170722	0.0147513	107/4085/64506/983/890/9088/1017/993/6196/5241/9133/207/3835/5347/387778/699	16
						Base excision repair	0.00098815	0.0233356	0.0201631	3978/3146/55247/2237/5427/5111/5424/5426	8
						FoxO signaling pathway	0.00196107	0.0428083	0.0369885	6648/1647/595/1017/7043/10912/1950/23710/9133/1030/207/5347/8660/100132074/10733/6502/3569/114907	18
						ABC transporters	0.00209161	0.0428083	0.0369885	9429/8714/10058/19/1244/5243/4363/10257/6890	9
						Small cell lung cancer	0.00232291	0.0445708	0.0385114	1870/1647/1869/595/4792/1017/10912/3674/1030/330/207/3918/6502/2272	14
						Rheumatoid arthritis	0.00257609	0.0462631	0.0399736	3576/3383/7043/1514/7422/6364/3725/1435/50617/6347/7124/525/3569/3689	14
						IL-17 signaling pathway	0.00285156	0.0462631	0.0399736	3576/55540/7128/8061/4322/4792/2354/6364/3725/1051/6347/5597/7124/3569	14
						Mismatch repair	0.00286319	0.0462631	0.0399736	3978/9156/5111/5424/5985/5984	6
Treat28	S084	Malva verticillata var. crispa	Malvaceae	Malva	Heat-Clearing	Cell cycle	7.13e-06	0.00146705	0.00129312	4171/1870/1031/8318/4085/9088/983/1647/4173/10912/5347/7043/1869/1875/4174/6502	16
						Ferroptosis	1.02e-05	0.00146705	0.00129312	64116/3162/23657/2495/2730/2512/2180/6520/6303	9
						Fluid shear stress and atherosclerosis	3.07e-05	0.00295833	0.0026076	3383/3162/8878/5608/1514/7056/1728/1843/1906/4257/7422/5602/3725/3674/59341/2941	16
						Cellular senescence	0.000410905	0.0263561	0.0232314	1870/8878/5608/3576/983/1647/10912/7043/2626/1869/824/59341/1875/3569/3106	15
						Transcriptional misregulation in cancer	0.000455988	0.0263561	0.0232314	860/4094/1649/1031/26471/3576/1647/10912/2119/4613/5468/5328/1051/3248/330/3569/8355	17
						TNF signaling pathway	0.000587673	0.0272332	0.0240045	3383/3659/5608/7128/1906/4792/5602/3725/1051/330/1435/3569	12
						Antifolate resistance	0.000659628	0.0272332	0.0240045	8714/9429/7298/1719/3569/10257	6
						Central carbon metabolism in cancer	0.000765011	0.027636	0.0243595	2261/5979/3417/3815/2645/4916/3099/2539/8140	9
						ABC transporters	0.000938697	0.0289104	0.0254828	8714/9429/368/10058/5244/19/10257	7
						Apoptosis	0.00104453	0.0289104	0.0254828	1649/1514/4001/1647/10912/4792/332/5602/3725/824/330/7277/113457	13
						NF-kappa B signaling pathway	0.0011004	0.0289104	0.0254828	3383/6387/3576/128178/1647/10912/7128/5971/4792/5328/330	11
						Small cell lung cancer	0.00149133	0.0334275	0.0294644	1870/1647/10912/4792/3674/1869/330/2272/3909/6502	10
						DNA replication	0.00150366	0.0334275	0.0294644	4171/3978/4173/23649/2237/4174	6
						MAPK signaling pathway	0.00174036	0.0338553	0.0298415	1846/1649/2261/374/2317/5608/6196/8817/3815/1647/1843/10912/5971/3306/7422/2324/7043/1852/5602/3725/1435	21
						IL-17 signaling pathway	0.0017572	0.0338553	0.0298415	55540/3576/4322/7128/4792/5602/3725/1051/225689/3569	10
						Epstein-Barr virus infection	0.00216894	0.0391765	0.0345318	1870/3383/5608/7431/1647/10912/7128/5971/4792/5602/3725/1869/6502/3569/956/3106	16
						FoxO signaling pathway	0.0023219	0.0394723	0.0347926	6648/1647/10912/5347/7043/5602/23678/114907/6502/23710/3569/102800317	12
						Bladder cancer	0.00299254	0.0480469	0.0423506	1870/2261/3576/7422/1869/23604	6
Treat21	S115	Mallotus barbatus	Euphorbiaceae	Mallotus	Unclassified	Cell cycle	3.6e-06	0.000595136	0.000472445	4171/1870/7043/1647/1017/10912/595/1869/1031/4998/993/4175/4172/990/4173/5111/4176/9088/1875/1028	20
						Ferroptosis	3.95e-06	0.000595136	0.000472445	3162/64116/2730/23657/2495/2512/2729/5621/81631/6520/6303	11
						DNA replication	7.79e-06	0.000781259	0.000620199	4171/3978/2237/4175/4172/23649/4173/5111/5424/4176	10
						Aminoacyl-tRNA biosynthesis	2.11e-05	0.00159105	0.00126304	4579/2617/7453/6301/16/4141/8565/6897/4570/3376/4553/4569/4564	13
						Bladder cancer	2.73e-05	0.0016456	0.00130635	2261/1870/7422/3576/595/1869/1839/7057/1950/999	10
						FoxO signaling pathway	0.000100133	0.00431314	0.00342397	7043/1647/1017/10912/595/604/5106/6648/23678/207/1950/8743/6446/100132074/23710/5602/114907/3569	18
						Glutathione metabolism	0.00011084	0.00431314	0.00342397	79094/2730/6241/3417/4257/2729/5226/2539/124975/2877/290	11
						Antifolate resistance	0.000114635	0.00431314	0.00342397	8714/9429/7298/1719/6472/4363/10257/3569	8
						TNF signaling pathway	0.000152435	0.00509812	0.00404712	5608/3383/7128/1051/468/4792/3725/3659/207/5602/1435/3976/1906/64127/3569/330	16
						Fluid shear stress and atherosclerosis	0.000215539	0.00648771	0.00515024	3162/5608/8878/3383/7422/5155/9181/1514/4257/1728/6383/3725/207/3674/59341/5602/1906/4208	18
						One carbon pool by folate	0.00034549	0.00945386	0.0075049	160428/10797/7298/25902/1719/6472	6
						Apoptosis	0.000488589	0.0122554	0.00972892	1649/1647/1514/10912/4001/332/468/4792/1515/3725/207/7277/8743/5602/2081/8739/330	17
						Small cell lung cancer	0.000695507	0.0161037	0.0127838	1870/1647/1017/10912/595/1869/4792/207/3674/3909/2272/330/1282	13
						MAPK signaling pathway	0.000918823	0.0197547	0.0156822	5608/1649/2261/7043/1647/7422/2317/5155/6196/1846/10912/3306/374/5971/1852/468/3725/2264/207/1950/5602/1435/10235/8605/776/4915/4208/25780	28
						Biosynthesis of amino acids	0.00129486	0.0259836	0.0206269	440/3417/102724560/7086/6472/26227/875/84706/29968/65263/586	11
						Pancreatic cancer	0.00144675	0.0271594	0.0215604	1870/7043/1647/7422/10912/595/1869/207/1950/5602/5337	11
						AGE-RAGE signaling pathway in diabetic complications	0.00153392	0.0271594	0.0215604	3383/7043/7422/3576/595/3725/2152/3717/207/5602/1906/3569/1282	13
						ABC transporters	0.00167993	0.0280921	0.0223008	8714/9429/10058/5243/6891/4363/10257/368	8
						Rap1 signaling pathway	0.00217409	0.0343555	0.0272729	5608/2261/5909/107/51466/7422/5155/2264/207/3674/57568/7057/1950/999/1435/10235/8631/10636/57121/2775/25780	21
						Cellular senescence	0.00228276	0.0343555	0.0272729	5608/1870/8878/7043/1647/3576/1017/10912/595/1869/993/207/59341/1875/2626/776/3569	17
Treat18	S104	Mallotus apelta	Euphorbiaceae	Mallotus	Heat-Clearing	Ferroptosis	6.41e-08	1.63e-05	1.44e-05	3162/64116/23657/2730/6520/2495/2512/643246/2180	9
						Steroid hormone biosynthesis	0.000164592	0.0209032	0.0184517	1543/1646/1645/1545/7366/412/8644	7
						Central carbon metabolism in cancer	0.000390885	0.0330949	0.0292135	3815/2261/8140/3417/2539/2645/4916	7
						Metabolism of xenobiotics by cytochrome P450	0.000756879	0.0396067	0.0349616	1543/1645/1545/7366/218/874/221	7
						Glutathione metabolism	0.00077966	0.0396067	0.0349616	6241/2730/79094/3417/2539/2877	6
						Chemical carcinogenesis	0.0010972	0.0464479	0.0410005	1543/1646/1545/7366/9/218/221	7
Treat16	S098	Gelsemium elegans	Loganiaceae	Gelsemium	Detoxifying, analgesia, antipruritic	Ferroptosis	2.59009e-06	0.000789979	0.00068433	3162/64116/23657/81631/2730/5621/643246/2495/2729/6520/2180/6303	12
						Aminoacyl-tRNA biosynthesis	2.36353e-05	0.00360438	0.00312235	2617/7453/833/6301/16/4141/8565/3376/6897/7407/4677/4569/2058/92935	14
						Axon guidance	6.31511e-05	0.00642036	0.00556173	7225/27289/6405/2045/90249/56896/8633/1949/56920/816/1944/5530/1943/285220/25791/2049/57556/7852/2534/10500/219699/84448/4776/7474/6585	25
						MAPK signaling pathway	0.000261603	0.0199472	0.0172796	1649/5608/2261/1843/374/7043/1647/7422/1846/6196/10912/3725/2260/27092/5155/2317/5971/1852/3815/5602/207/1844/1944/468/9254/3310/1950/5530/1943/9064/4791/2065/1435	33
Treat23	S120	Entada phaseoloides	Fabaceae	Entada	Heat-clearingastringent	Steroid hormone biosynthesis	2.24e-05	0.00320714	0.00277531	1543/1545/1646/1645/7366/8644	6
						Ferroptosis	3.94e-05	0.00320714	0.00277531	23657/3162/2730/2495/2512	5
						Metabolism of xenobiotics by cytochrome P450	9.12e-05	0.00495662	0.00428923	1543/1545/1645/7366/4257/218	6
						Chemical carcinogenesis	0.00012911	0.00526114	0.00455275	1543/1545/1646/7366/4257/218	6
						Glutathione metabolism	0.00019528	0.00636597	0.00550882	3417/79094/4257/2730/2539	5
						TGF-beta signaling pathway	0.00025639	0.00696538	0.00602752	3399/3398/3400/4092/4091/8646	6
						Central carbon metabolism in cancer	0.00051268	0.0119382	0.0103308	3417/2261/8140/2539/2645	5
						Carbon metabolism	0.00086649	0.0176548	0.0152776	4199/7086/3417/2539/26227/2645	6
Treat74	S147	Cornus macrophylla	Cornaceae	Cornus	Unclassified	Steroid hormone biosynthesis	2.62035e-07	5.65996e-05	5.13038e-05	1543/1646/1545/1645/8644/7366/54578/7367	8
						Ferroptosis	4.63036e-06	0.000500079	0.000453288	3162/23657/2730/2495/6520/2512	6
						Metabolism of xenobiotics by cytochrome P450	2.00591e-05	0.00144425	0.00130912	1543/1545/1645/7366/218/54578/7367	7
						Chemical carcinogenesis	3.01696e-05	0.00162916	0.00147672	1543/1646/1545/7366/218/54578/7367	7
						Porphyrin and chlorophyll metabolism	8.42975e-05	0.00348337	0.00315744	3162/7366/2235/54578/7367	5
						Retinol metabolism	9.67602e-05	0.00348337	0.00315744	1543/220/7366/54578/9249/7367	6
						Glutathione metabolism	0.000365053	0.0112645	0.0102105	2730/3417/2539/124975/2877	5
						Bile secretion	0.00041882	0.0113082	0.0102501	9429/8714/7366/107/54578/7367	6
						Pentose and glucuronate interconversions	0.000473169	0.011356	0.0102935	7366/54578/57016/7367	4
						Central carbon metabolism in cancer	0.000944611	0.0204036	0.0184945	3417/2261/8140/2539/2645	5
						Biosynthesis of cofactors	0.00149159	0.0292894	0.0265488	1728/2730/7366/2235/54578/9249/7367	7
						Carbon metabolism	0.00173955	0.0313119	0.0283821	4199/3417/7086/2539/2645/26227	6
						Ovarian steroidogenesis	0.00221548	0.036811	0.0333667	1543/1545/8644/107	4
Treat76	S161	Aristolochia tagala	Aristolochiaceae	Aristolochia	Rsthmatics, expectorants and antitussives	p53 signaling pathway	9.61869e-14	2.54895e-11	2.36923e-11	9540/1647/355/1643/55240/1026/7161/900/7057/8493/27244/10912/83667/5268/8795/27113/5054	17
						Retinol metabolism	1.30555e-05	0.00172985	0.00160789	1543/220/9249/7366/54884/54578/316/7367/1592	9
						Steroid hormone biosynthesis	3.84543e-05	0.00339679	0.0031573	1543/1545/7366/1646/54578/8644/1645/7367	8
						Ferroptosis	0.000199211	0.0131977	0.0122672	64116/55240/3162/23657/2730/6520	6
Treat79	S166	Dalbergia pinnata	Fabaceae	Dalbergia	Heat-Clearing	TGF-beta signaling pathway	7.89152e-06	0.000220963	0.000141217	3398/3399/3397/3400	4
						Signaling pathways regulating pluripotency of stem cells	4.15625e-05	0.000581875	0.000371875	3398/3399/3397/3400	4
						Tryptophan metabolism	0.00168162	0.0156952	0.0100307	1543/1545	2
						Ovarian steroidogenesis	0.0024718	0.0173026	0.011058	1543/1545	2
						Steroid hormone biosynthesis	0.00351863	0.0197043	0.012593	1543/1545	2
						Metabolism of xenobiotics by cytochrome P450	0.00569367	0.0257022	0.0164262	1543/1545	2
						Chemical carcinogenesis	0.00642554	0.0257022	0.0164262	1543/1545	2
Treat88	S083	Phyllanthus reticulatus Poir. var. glaberMuell.-Age.	Euphorbiaceae	Phyllanthus	Promoting blood circulation and removing stasis	Steroid biosynthesis	4.19468e-10	1.23743e-07	1.1436e-07	6307/4047/6309/2222/1595/51478/1717/6713/10682/1056	10
						Glycolysis / Gluconeogenesis	3.82637e-06	0.000564389	0.000521594	55902/230/2821/3939/5214/2026/5236/3099/226/5230/2645/221	12
						Terpenoid backbone biosynthesis	7.7843e-06	0.000765457	0.000707416	3157/4597/3422/2224/39/3156/4598	7
						Carbon metabolism	8.01738e-05	0.00510803	0.00472072	55902/230/4199/7086/3417/39/2821/5214/2026/3099/226/5230/2645/26227	14
						Ferroptosis	8.65769e-05	0.00510803	0.00472072	64116/2180/2512/2495/81631/23657/3162/6303	8
						Starch and sucrose metabolism	0.000247054	0.0121468	0.0112258	2997/2821/5236/3099/5836/2645/283209	7
						Biosynthesis of amino acids	0.000325446	0.0137152	0.0126753	230/7086/3417/5214/2026/5053/226/440/5230/26227	10
						Bladder cancer	0.000570391	0.0193332	0.0178673	7422/1870/3576/2261/23604/1869/3265	7
						Pentose phosphate pathway	0.000589828	0.0193332	0.0178673	230/7086/2821/5214/5236/226	6
Treat65	S044	Euphorbia hirta	Euphorbiaceae	Euphorbia	Heat-Clearing	Steroid hormone biosynthesis	2.8094e-06	0.000488835	0.000440632	1543/1545/1646/8644/1645/54578/7366	7
						Retinol metabolism	7.45422e-05	0.00648517	0.00584568	1543/220/54578/7366/316/112724	6
						Metabolism of xenobiotics by cytochrome P450	0.000148267	0.00859948	0.0077515	1543/1545/218/1645/54578/7366	6
						Chemical carcinogenesis	0.000209066	0.00909438	0.00819759	1543/1545/1646/218/54578/7366	6
						Porphyrin and chlorophyll metabolism	0.000897773	0.0312425	0.0281617	3162/54578/7366/2235	4
						ABC transporters	0.00116717	0.0338479	0.0305102	9429/8714/6833/10058	4
Treat4	W5	Panax stipuleanatus	Araliaceae	Panax	Promoting blood circulation and removing stasis	Aminoacyl-tRNA biosynthesis	0.00816125	0.00816125	NA	4579	1
Treat7	GX0823	Arctium lappa	Asteraceae	Arctium	Unclassified	Ferroptosis	6.76799e-05	0.0201686	0.0181667	64116/3162/23657/81631/2495/2512/2730/6303	8
Treat11	GX0827	Astragalus membranaceus	Leguminosae	Astragalus	Tonic	Intestinal immune network for IgA production	0.000355516	0.0021331	0.000748454	23308/102723996	2
						Cell adhesion molecules	0.00325133	0.00975399	0.00342245	23308/102723996	2
Treat13	S085	Ligustrum confusum	Oleaceae	Ligustrum	Unclassified	Steroid hormone biosynthesis	4.93196e-07	2.7619e-05	2.44002e-05	1543/1545/7366/1646/1645	5
						Metabolism of xenobiotics by cytochrome P450	5.13433e-05	0.00122371	0.0010811	1543/1545/7366/1645	4
						Chemical carcinogenesis	6.55558e-05	0.00122371	0.0010811	1543/1545/7366/1646	4
						Retinol metabolism	0.000815109	0.0114115	0.0100816	1543/220/7366	3
Treat14	S086	Gynura procumbens	Asteraceae	Gynura	Promoting blood circulation and removing stasis	Fc gamma R-mediated phagocytosis	0.0119946	0.0238655	NA	3055	1
						Chemokine signaling pathway	0.0237418	0.0238655	NA	3055	1
						Kaposi sarcoma-associated herpesvirus infection	0.0238655	0.0238655	NA	3055	1
Treat17	S103	Phyllodium elegans	Fabaceae	Phyllodium	Hemostatic	Steroid hormone biosynthesis	4.21714e-05	0.00784388	0.00714695	1646/1645/8644/1543/54578/1545	6
						Biosynthesis of amino acids	0.000135815	0.0126308	0.0115085	440/3417/26227/5723/29968/84706	6
						Carbon metabolism	0.000244307	0.0151471	0.0138012	4199/3417/2645/26227/5723/29968/84706	7
						Axon guidance	0.000669866	0.0311488	0.0283812	6469/7225/90249/59277/56920/9037/816/219699	8
						Ferroptosis	0.000894476	0.0332745	0.030318	23657/3162/2180/2495	4
Treat19	S109	Chenopodium album	Chenopodiaceae	Chenopodium	Heat-Clearing	Steroid hormone biosynthesis	3.85599e-06	0.000443438	0.000393716	1543/7366/1646/1645/8644/1545	6
						Metabolism of xenobiotics by cytochrome P450	1.62669e-05	0.000891839	0.000791839	1543/218/7366/2950/1645/1545	6
						Chemical carcinogenesis	2.32654e-05	0.000891839	0.000791839	1543/218/7366/2950/1646/1545	6
						Retinol metabolism	0.000115938	0.00333321	0.00295946	1543/220/7366/9249/112724	5
						Biosynthesis of amino acids	0.000172419	0.00396563	0.00352097	440/3417/7086/26227/29968	5
						Glutathione metabolism	0.000663634	0.0127197	0.0112934	79094/2950/3417/2877	4
						Carbon metabolism	0.00138883	0.0228165	0.0202582	3417/4199/7086/26227/29968	5
Treat90	S055	Argyreia pierreana	Convolvulaceae	Argyreia	Heat-Clearing	Glutathione metabolism	4.06709e-06	0.000521685	0.000469391	2730/3417/4257/2729/5226/124975/2539/2877	8
						Ferroptosis	4.32934e-06	0.000521685	0.000469391	3162/64116/2730/23657/2495/2729/2512	7
						Steroid hormone biosynthesis	6.36476e-05	0.00511303	0.00460049	1543/1545/1646/1645/8644/54578/7366	7
						Metabolism of xenobiotics by cytochrome P450	0.000304616	0.0183531	0.0165134	1543/1545/1645/218/4257/54578/7366	7
						Chemical carcinogenesis	0.000446769	0.0215343	0.0193757	1543/1545/1646/218/4257/54578/7366	7
						Tryptophan metabolism	0.000623469	0.0250427	0.0225324	1543/1545/316/4129/8564	5
						Axon guidance	0.000901621	0.0310415	0.0279299	90249/7225/6387/57556/27289/816/7852/59277/10501/84448	10
						Drug metabolism - cytochrome P450	0.00122641	0.0369457	0.0332423	316/218/4257/4129/54578/7366	6
						Pentose phosphate pathway	0.00145331	0.0389164	0.0350154	7086/5631/5226/2539	4
Treat20	S111	Polygonum perfoliatum	Polygonaceae	Polygonum	Heat-Clearing	Chemical carcinogenesis	3.56e-05	0.00142243	0.00101067	1543/1646/1545/218	4
						Tryptophan metabolism	0.00011914	0.00238279	0.00169303	1543/1545/316	3
						Steroid hormone biosynthesis	0.00036311	0.00484147	0.00343999	1543/1646/1545	3
						Retinol metabolism	0.00052237	0.00522369	0.00371157	1543/316/220	3
						Metabolism of xenobiotics by cytochrome P450	0.00074841	0.00598726	0.00425411	1543/1545/218	3
						Tyrosine metabolism	0.00314167	0.0209445	0.0148816	316/218	2
						Ovarian steroidogenesis	0.00622622	0.0355784	0.0252794	1543/1545	2
						Chemokine signaling pathway	0.0096455	0.0455895	0.0323925	3055/9547/1235	3
						Aminoacyl-tRNA biosynthesis	0.0102576	0.0455895	0.0323925	4579/4570	2
						Drug metabolism - cytochrome P450	0.0121212	0.0484849	0.0344498	316/218	2
Treat22	S118	Mucuna macrocarpa	Fabaceae	Mucuna	Rheumatism treatment	Tryptophan metabolism	0.000187301	0.00842857	0.00690058	1543/1545/316	3
						Steroid hormone biosynthesis	0.000567855	0.0122266	0.0100101	1543/1545/1646	3
						Retinol metabolism	0.000815109	0.0122266	0.0100101	1543/220/316	3
						Chemical carcinogenesis	0.0013946	0.0156892	0.012845	1543/1545/1646	3
Treat25	S127	Kadsura coccinea	Schisandraceae	Kadsura	Promoting blood circulation and removing stasis	Steroid hormone biosynthesis	3.78851e-09	5.22815e-07	4.54621e-07	1543/1646/7366/1645/1545/54578/8644/7367	8
						Metabolism of xenobiotics by cytochrome P450	9.48167e-06	0.000625453	0.000543872	1543/7366/1645/1545/54578/7367	6
						Chemical carcinogenesis	1.35968e-05	0.000625453	0.000543872	1543/1646/7366/1545/54578/7367	6
						Retinol metabolism	7.43742e-05	0.00256591	0.00223123	1543/220/7366/54578/7367	5
						Biosynthesis of amino acids	0.000110947	0.00306212	0.00266272	440/3417/26227/29968/586	5
						Bile secretion	0.00026272	0.00604255	0.0052544	9429/8714/7366/54578/7367	5
						Biosynthesis of cofactors	0.00045783	0.00902579	0.00784851	7366/1728/54578/29968/7367/586	6
						Ascorbate and aldarate metabolism	0.000900712	0.0140056	0.0121788	7366/54578/7367	3
						Carbon metabolism	0.000913409	0.0140056	0.0121788	4199/3417/26227/29968/2645	5
						Pentose and glucuronate interconversions	0.00130372	0.0179913	0.0156446	7366/54578/7367	3
						Porphyrin and chlorophyll metabolism	0.00241224	0.0302627	0.0263154	7366/54578/7367	3
						Cysteine and methionine metabolism	0.00397237	0.0446021	0.0387844	26227/29968/586	3
						Ovarian steroidogenesis	0.00420165	0.0446021	0.0387844	1543/1545/8644	3
Treat26	S071	Amaranthus tricolor	Amaranthaceae	Amaranthus	Heat-Clearing	Tryptophan metabolism	0.000260741	0.00257404	0.000967686	1543/1545	2
						Ovarian steroidogenesis	0.000385253	0.00257404	0.000967686	1543/1545	2
						Steroid hormone biosynthesis	0.000551581	0.00257404	0.000967686	1543/1545	2
						Metabolism of xenobiotics by cytochrome P450	0.000901321	0.0028563	0.0010738	1543/1545	2
						Chemical carcinogenesis	0.00102011	0.0028563	0.0010738	1543/1545	2
						Spliceosome	0.0186719	0.0229999	NA	7919	1
						RNA transport	0.0229999	0.0229999	NA	7919	1
Treat41	GX0831	Salvia miltiorrhiza	Lamiaceae	Salvia	Promoting blood circulation and removing stasis	Retinol metabolism	0.00105272	0.0178962	0.00775689	220/1543	2
Treat44	GX0836	Scutellaria baicalensis	Lamiaceae	Scutellaria	Heat-Clearing	Steroid hormone biosynthesis	5.23941e-05	0.00371998	0.0034194	1543/1545/1646/1645	4
						Metabolism of xenobiotics by cytochrome P450	0.000137538	0.00414382	0.003809	1543/1545/218/1645	4
						Chemical carcinogenesis	0.000175091	0.00414382	0.003809	1543/1545/218/1646	4
Treat48	GX0842	Swertia leducii	Gentianaceae	Swertia	Heat-Clearing	Tryptophan metabolism	0.000139658	0.00656393	0.00499829	1543/1545/316	3
						Retinol metabolism	0.000610808	0.0123111	0.00937461	1543/220/316	3
						Metabolism of xenobiotics by cytochrome P450	0.00087439	0.0123111	0.00937461	1543/1545/218	3
						Chemical carcinogenesis	0.00104775	0.0123111	0.00937461	1543/1545/218	3
						Tyrosine metabolism	0.00348101	0.0327215	0.0249167	218/316	2
Treat51	GX0849	Polygonum aviculare	Polygonaceae	Polygonum	Water-disinhibiting and damp-percolating	Metabolism of xenobiotics by cytochrome P450	5.76888e-05	0.0122877	0.0102625	2950/218/1645/1543/54578/29785	6
						Steroid hormone biosynthesis	0.000183744	0.0195687	0.0163435	1646/8644/1645/1543/54578	5
Treat52	GX0850	Kummerowia striata	Fabaceae	Kummerowia	Heat-Clearing	Steroid hormone biosynthesis	5.24636e-07	4.66926e-05	3.81051e-05	1543/1545/1646/8644/54578/1645	6
						Metabolism of xenobiotics by cytochrome P450	2.27793e-06	9.74742e-05	7.95473e-05	1543/2950/1545/218/54578/1645	6
						Chemical carcinogenesis	3.28565e-06	9.74742e-05	7.95473e-05	1543/2950/1545/218/1646/54578	6
						Ferroptosis	0.00112806	0.0250993	0.0204832	23657/2730/3162	3
						Cysteine and methionine metabolism	0.0020096	0.0315612	0.0257566	29968/3945/2730	3
						Ovarian steroidogenesis	0.00212772	0.0315612	0.0257566	1543/1545/8644	3
						Glutathione metabolism	0.00292731	0.0372186	0.0303736	2950/124975/2730	3
Treat56	GX0858	Immature ruit of Citrus aurantium L.	Rutaceae	Citrus	Qi-regulating	Steroid hormone biosynthesis	1.59321e-05	0.00114711	0.00100624	1543/1545/54578/1646	4
						Chemical carcinogenesis	5.40576e-05	0.00194607	0.00170708	1543/1545/54578/1646	4
						Retinol metabolism	0.000708269	0.0169985	0.0149109	1543/54578/220	3
						Metabolism of xenobiotics by cytochrome P450	0.00101307	0.0182352	0.0159958	1543/1545/54578	3
Treat59	S022	Cyperus rotundus	Cyperaceae	Cyperus	Qi-regulating	Steroid hormone biosynthesis	3.3217e-05	0.00166085	0.00150351	1543/1545/1646	3
						Chemical carcinogenesis	8.37649e-05	0.00209412	0.00189573	1543/1545/1646	3
						Tryptophan metabolism	0.000926362	0.0154394	0.0139767	1543/1545	2
						Ovarian steroidogenesis	0.00136467	0.0170584	0.0154424	1543/1545	2
						Metabolism of xenobiotics by cytochrome P450	0.00316443	0.0316443	0.0286464	1543/1545	2
Treat60	S029	Blumea riparia	Asteraceae	Blumea	Hemostatic	Glutathione metabolism	3.26002e-06	0.000342138	0.000309598	2730/2729/4257/124975/2877/290/2539	7
						Steroid hormone biosynthesis	5.18456e-06	0.000342138	0.000309598	1543/1545/1646/1645/8644/54578/7366	7
						Ferroptosis	6.00242e-06	0.000342138	0.000309598	3162/23657/2730/2729/6520/2495	6
						Metabolism of xenobiotics by cytochrome P450	2.6841e-05	0.00114745	0.00103832	1543/1545/1645/218/54578/7366/4257	7
						Chemical carcinogenesis	4.02831e-05	0.00137768	0.00124665	1543/1545/1646/218/54578/7366/4257	7
						Biosynthesis of cofactors	0.000378248	0.0107801	0.00975482	1728/2730/2235/54578/2729/7366/129607/93100	8
						Retinol metabolism	0.00108169	0.0249118	0.0225425	1543/220/54578/316/7366	5
						Porphyrin and chlorophyll metabolism	0.00126168	0.0249118	0.0225425	3162/2235/54578/7366	4
						Drug metabolism - cytochrome P450	0.00131115	0.0249118	0.0225425	218/54578/316/7366/4257	5
Treat61	S031	Humulus scandens	Cannabaceae	Humulus	Water-disinhibiting and damp-percolating	Steroid hormone biosynthesis	3.2939e-06	0.000360197	0.000313122	1543/1545/1646/1645/8644/7366/54578	7
						Ferroptosis	4.04715e-06	0.000360197	0.000313122	3162/23657/2730/2729/2495/6520	6
						Metabolism of xenobiotics by cytochrome P450	1.72416e-05	0.001023	0.000889301	1543/1545/1645/218/7366/54578/4257	7
						Chemical carcinogenesis	2.59598e-05	0.00115521	0.00100424	1543/1545/1646/218/7366/54578/4257	7
						Drug metabolism - cytochrome P450	0.000108095	0.00384818	0.00334525	218/316/7366/54578/4129/4257	6
						Glutathione metabolism	0.000328015	0.0097311	0.00845933	2730/2729/4257/2877/124975	5
						Retinol metabolism	0.000796815	0.0193957	0.0168609	1543/220/316/7366/54578	5
						Tryptophan metabolism	0.000980682	0.0193957	0.0168609	1543/1545/316/4129	4
						Porphyrin and chlorophyll metabolism	0.000980682	0.0193957	0.0168609	3162/7366/54578/2235	4
Treat63	S034	Chromolaena odorata	Asteraceae	Chromolaena	Hemostatic	Steroid hormone biosynthesis	2.38593e-06	0.000290654	0.000254423	1543/1646/1545/1645/8644/7366/54578	7
						Ferroptosis	3.05951e-06	0.000290654	0.000254423	3162/2730/23657/2729/2495/6520	6
						Metabolism of xenobiotics by cytochrome P450	1.2581e-05	0.000796794	0.000697471	1543/1545/1645/218/7366/54578/4257	7
						Chemical carcinogenesis	1.89834e-05	0.000901714	0.000789312	1543/1646/1545/218/7366/54578/4257	7
						Retinol metabolism	0.000640904	0.0222556	0.0194813	1543/316/220/7366/54578	5
						Drug metabolism - cytochrome P450	0.000779216	0.0222556	0.0194813	316/218/7366/54578/4257	5
						Porphyrin and chlorophyll metabolism	0.000819942	0.0222556	0.0194813	3162/7366/54578/2235	4
						Cushing syndrome	0.000946948	0.02249	0.0196866	1870/3164/51655/83439/816/6932/1031	7
						ABC transporters	0.00106661	0.0225172	0.0197104	9429/8714/10058/1244	4
						Hepatocellular carcinoma	0.00151388	0.0287638	0.0251783	3162/7296/1870/1728/4257/83439/6932	7
						Bile secretion	0.00212372	0.0366825	0.0321099	9429/8714/7366/54578/1244	5
						Glutathione metabolism	0.00257928	0.0408387	0.035748	2730/2729/124975/4257	4
						Prostate cancer	0.00294726	0.0430754	0.0377059	1870/5328/83439/1950/6932	5
						Antifolate resistance	0.00368087	0.0499547	0.0437277	9429/8714/1244	3
Treat66	S047	Malvastrum coromandelianum	Malvaceae	Malvastrum	Heat-Clearing	Ferroptosis	2.19836e-06	0.000485839	0.000448929	3162/64116/23657/2730/2729/2495/6520	7
						Steroid hormone biosynthesis	3.32399e-05	0.00367301	0.00339397	1543/1545/1646/1645/8644/7366/54578	7
						Metabolism of xenobiotics by cytochrome P450	0.000162899	0.0106336	0.00982579	1543/1545/1645/218/7366/54578/4257	7
						Glutathione metabolism	0.0002017	0.0106336	0.00982579	2730/2729/4257/124975/2877/2539	6
						Chemical carcinogenesis	0.00024058	0.0106336	0.00982579	1543/1545/1646/218/7366/54578/4257	7
						Tryptophan metabolism	0.000391729	0.0144287	0.0133325	1543/1545/316/4129/8564	5
						Biosynthesis of cofactors	0.000558715	0.0176394	0.0162994	1728/2730/7366/2729/2235/54578/8564/4143/129607	9
						Drug metabolism - cytochrome P450	0.000722594	0.0199616	0.0184452	218/7366/316/54578/4257/4129	6
Treat67	S048	Abutilon indicum	Malvaceae	Abutilon	Heat-Clearing	Chemical carcinogenesis	7.54883e-08	2.86856e-06	1.82761e-06	1543/1545/1646/54578/218	5
						Steroid hormone biosynthesis	1.38641e-06	2.63418e-05	1.67829e-05	1543/1545/1646/54578	4
						Metabolism of xenobiotics by cytochrome P450	3.73866e-06	4.73564e-05	3.01717e-05	1543/1545/54578/218	4
						Retinol metabolism	0.000123788	0.00117598	0.000749241	1543/220/54578	3
						Tryptophan metabolism	0.00168162	0.0127803	0.0081426	1543/1545	2
						Ovarian steroidogenesis	0.0024718	0.0156547	0.00997393	1543/1545	2
						Drug metabolism - cytochrome P450	0.00487019	0.0264382	0.0168443	54578/218	2
						Bile secretion	0.00751874	0.035714	0.0227541	9429/54578	2
Treat68	S052	Acmella paniculata	Asteraceae	Acmella	Rsthmatics, expectorants and antitussives	Steroid hormone biosynthesis	5.36885e-07	8.59016e-05	7.34685e-05	1543/1545/1646/8644/54578/7366/1645	7
						Metabolism of xenobiotics by cytochrome P450	3.80225e-05	0.00288658	0.00246879	1543/1545/218/54578/7366/1645	6
						Chemical carcinogenesis	5.41235e-05	0.00288658	0.00246879	1543/1545/1646/218/54578/7366	6
						Retinol metabolism	0.000233215	0.00932859	0.0079784	1543/220/54578/7366/316	5
						Porphyrin and chlorophyll metabolism	0.000358771	0.0114807	0.00981899	3162/54578/7366/2235	4
Treat69	S055	Argyreia pierreana	Convolvulaceae	Argyreia	Heat-Clearing	Steroid hormone biosynthesis	3.53872e-08	3.82182e-06	3.35247e-06	1543/1545/1646/1645/54578/8644/7366	7
						Metabolism of xenobiotics by cytochrome P450	4.00204e-06	0.000207369	0.000181903	1543/1545/218/1645/54578/7366	6
						Chemical carcinogenesis	5.76025e-06	0.000207369	0.000181903	1543/1545/1646/218/54578/7366	6
						Retinol metabolism	3.66148e-05	0.000988601	0.000867194	1543/220/316/54578/7366	5
						Drug metabolism - cytochrome P450	0.000653264	0.0141105	0.0123776	218/316/54578/7366	4
						Ferroptosis	0.00148066	0.0214432	0.0188098	3162/23657/2730	3
						Tryptophan metabolism	0.00158839	0.0214432	0.0188098	1543/1545/316	3
						Porphyrin and chlorophyll metabolism	0.00158839	0.0214432	0.0188098	3162/54578/7366	3
						Ovarian steroidogenesis	0.0027826	0.0333912	0.0292905	1543/1545/8644	3
						Axon guidance	0.00321939	0.0347694	0.0304995	90249/27289/91584/56920/7225	5
Treat70	S058	Pteris semipinnata	Pteridaceae	Pteris	Hemostatic	Steroid hormone biosynthesis	4.84708e-08	6.30121e-06	5.3573e-06	1646/1645/8644/1543/54578/7366/1545	7
						Metabolism of xenobiotics by cytochrome P450	2.72592e-07	1.77185e-05	1.50643e-05	1645/1543/4257/54578/218/7366/1545	7
						Chemical carcinogenesis	4.19172e-07	1.81641e-05	1.54432e-05	1646/1543/4257/54578/218/7366/1545	7
						Ferroptosis	3.41563e-06	0.000111008	9.43793e-05	3162/23657/2495/2730/2512	5
						Glutathione metabolism	1.78051e-05	0.000462932	0.000393586	4257/2730/2539/124975/2877	5
						Drug metabolism - cytochrome P450	5.57521e-05	0.00120796	0.00102701	316/4257/54578/218/7366	5
						Retinol metabolism	0.000656709	0.012196	0.0103691	316/1543/54578/7366	4
						Pentose and glucuronate interconversions	0.000970365	0.0157684	0.0134064	54578/57016/7366	3
						Fluid shear stress and atherosclerosis	0.00119882	0.0173163	0.0147223	3162/1728/4257/5608/8878	5
						Bile secretion	0.00177574	0.019522	0.0165977	8714/9429/54578/7366	4
						Tryptophan metabolism	0.00180203	0.019522	0.0165977	316/1543/1545	3
						Porphyrin and chlorophyll metabolism	0.00180203	0.019522	0.0165977	3162/54578/7366	3
						ABC transporters	0.00220045	0.0220045	0.0187083	8714/9429/10058	3
						Hepatocellular carcinoma	0.00276258	0.0256525	0.0218098	3162/1728/7296/6932/4257	5
						Ovarian steroidogenesis	0.00315168	0.0273146	0.0232229	8644/1543/1545	3
						Mineral absorption	0.00476304	0.0386997	0.0329026	3162/2495/2512	3
Treat71	S059	Artemisia lactiflora	Asteraceae	Artemisia	Heat-Clearing	Steroid hormone biosynthesis	1.38641e-06	5.407e-05	4.52408e-05	1543/1545/1646/1645	4
						Metabolism of xenobiotics by cytochrome P450	0.000178389	0.00278914	0.00233369	1543/1545/1645	3
						Chemical carcinogenesis	0.000214549	0.00278914	0.00233369	1543/1545/1646	3
						Tryptophan metabolism	0.00168162	0.0163958	0.0137185	1543/1545	2
						Ovarian steroidogenesis	0.0024718	0.01928	0.0161317	1543/1545	2
						Retinol metabolism	0.00448112	0.0291273	0.024371	1543/112724	2
Treat72	S063	Tabernaemontana divaricata	Apocynaceae	Tabernaemontana	Heat-Clearing	Ferroptosis	1.71071e-06	0.000437941	0.000406968	3162/23657/2729/2730/2495/81631/5621/6520	8
						One carbon pool by folate	4.64561e-05	0.00561274	0.00521578	160428/10797/25902/6472/7298	5
						Aminoacyl-tRNA biosynthesis	6.57743e-05	0.00561274	0.00521578	7453/2617/833/8565/4141/6301/16/3376	8
						Biosynthesis of amino acids	0.000164566	0.0105322	0.00978735	440/3417/6472/5723/26227/586/84706/29968	8
						Biosynthesis of cofactors	0.000427818	0.0219043	0.0203551	10797/25902/1728/2729/6472/2730/11019/9249/586/29968/54578	11
Treat75	S155	Solanum aculeatissimum	Solanaceae	Solanum	Unclassified	Retinol metabolism	6.84e-05	0.00273412	0.00237437	220/1543/112724	3
Treat77	S162	Solanum erianthum	Solanaceae	Solanum	Hemostatic	Steroid hormone biosynthesis	1.9363e-05	0.000996079	0.000865432	1543/1545/1646/54578	4
						Retinol metabolism	3.16216e-05	0.000996079	0.000865432	1543/220/9249/54578	4
						Chemical carcinogenesis	6.55558e-05	0.00137667	0.00119611	1543/1545/1646/54578	4
						Metabolism of xenobiotics by cytochrome P450	0.00116492	0.0183475	0.015941	1543/1545/54578	3
Treat78	S165	Trachelospermum jasminoides	Apocynaceae	Trachelospermum	Rheumatism treatment	Steroid hormone biosynthesis	1.18754e-05	0.00176943	0.00150005	1646/1543/54578/1645/7366/8644	6
						Biosynthesis of amino acids	3.92159e-05	0.00292158	0.00247679	440/26227/5723/586/29968/84706	6
						Retinol metabolism	0.000287542	0.0142812	0.012107	220/1543/54578/316/7366	5
Treat80	S171	Ageratina adenophora	Asteraceae	Ageratina	Promoting blood circulation and removing stasis	Steroid hormone biosynthesis	7.64739e-06	0.0010324	0.000917687	1543/1646/1545/1645/8644/54578	6
						Ferroptosis	1.59376e-05	0.00107579	0.000956257	23657/3162/2730/2495/6520	5
Treat82	W7	Panax quinquefolium Linn	Araliaceae	Panax	Tonic	mRNA surveillance pathway	0.0119946	0.0229999	NA	7919	1
						Spliceosome	0.0186719	0.0229999	NA	7919	1
						RNA transport	0.0229999	0.0229999	NA	7919	1
Treat83	W6	Panax japonicus var. angustifolius	Araliaceae	Panax	Tonic	Spliceosome	0.0186719	0.0186719	NA	100534599	1
Treat84	W8	Panax zingiberensis C. Y. Wu et K. M. Feng	Araliaceae	Panax	Hemostatic	Spliceosome	0.00202754	0.00811014	0.00213425	7919/100534599	2
						Endocytosis	0.00556718	0.0111344	0.00293009	9744/414189	2
Treat86	W1	Panax notoginseng	Araliaceae	Panax	Promoting blood circulation and removing stasis	mRNA surveillance pathway	0.0119946	0.0229999	NA	7919	1
						Spliceosome	0.0186719	0.0229999	NA	7919	1
						RNA transport	0.0229999	0.0229999	NA	7919	1
Treat34		Doxorubicin hydrochloride			Positive controls	Cell cycle	2.42e-11	2.56e-09	1.86e-09	4171/1870/4998/993/4175/8318/4176/4172/1869/1026	10
						DNA replication	5.8e-11	3.07e-09	2.23e-09	4171/4175/5424/4176/4172/2237/5984	7
						p53 signaling pathway	0.000181505	0.00641316	0.00464906	6241/355/1026/27244	4
						Bladder cancer	0.000541746	0.0143563	0.0104072	1870/1869/1026	3
						MicroRNAs in cancer	0.00117807	0.0227211	0.0164711	1870/993/113130/1869/1026/27165	6
						Breast cancer	0.0025367	0.0227211	0.0164711	1870/1869/1026/7480	4
						Gastric cancer	0.0026643	0.0227211	0.0164711	1870/1869/1026/7480	4
						Melanoma	0.00278914	0.0227211	0.0164711	1870/1869/1026	3
						Non-small cell lung cancer	0.00278914	0.0227211	0.0164711	1870/1869/1026	3
						Cushing syndrome	0.00307358	0.0227211	0.0164711	1870/1869/1026/7480	4
						Glioma	0.00313262	0.0227211	0.0164711	1870/1869/1026	3
						Cellular senescence	0.00314575	0.0227211	0.0164711	1870/993/1869/1026	4
						Hepatitis C	0.00321907	0.0227211	0.0164711	1870/355/1869/1026	4
						Pancreatic cancer	0.00325264	0.0227211	0.0164711	1870/1869/1026	3
						Chronic myeloid leukemia	0.00325264	0.0227211	0.0164711	1870/1869/1026	3
						Hepatitis B	0.00360335	0.0227211	0.0164711	1870/355/1869/1026	4
						Mismatch repair	0.00364394	0.0227211	0.0164711	5424/5984	2
						Hepatocellular carcinoma	0.0041045	0.0241709	0.0175221	1870/1869/1026/7480	4
						Small cell lung cancer	0.0055669	0.0310575	0.0225143	1870/1869/1026	3
						Prostate cancer	0.0064492	0.032297	0.0234129	1870/1869/1026	3
						Endocrine resistance	0.00663511	0.032297	0.0234129	1870/1869/1026	3
						Kaposi sarcoma-associated herpesvirus infection	0.00670315	0.032297	0.0234129	1870/355/1869/1026	4
						Base excision repair	0.00741975	0.0341954	0.0247891	5424/2237	2
						Epstein-Barr virus infection	0.00785719	0.0347026	0.0251568	1870/355/1869/1026	4
						Human T-cell leukemia virus 1 infection	0.0103816	0.0440182	0.0319099	1870/1869/1026/8061	4
						Homologous recombination	0.0112987	0.0446984	0.032403	8438/5424	2
						Human cytomegalovirus infection	0.0113854	0.0446984	0.032403	1870/355/1869/1026	4
Treat36		Gemcitabine			Positive controls	FoxO signaling pathway	0.000260431	0.000520863	NA	100533105/23678	2
						PI3K-Akt signaling pathway	0.00191098	0.00191098	NA	100533105/23678	2
Treat39		Sorafenib			Positive controls	Hippo signaling pathway - multiple species	0.00094513	0.031335	0.0272972	102800317/1454	2
						Circadian rhythm	0.00108052	0.031335	0.0272972	102800317/1454	2
						Hippo signaling pathway	0.00177939	0.0324557	0.0282735	102800317/1454/1742	3
						Cocaine addiction	0.00268842	0.0324557	0.0282735	2354/1742	2
						Hedgehog signaling pathway	0.0027979	0.0324557	0.0282735	102800317/1454	2
Treat40		Sorafenib			Positive controls	Cell cycle	0.0013992	0.0415543	0.0396148	1870/991/9232	3
						Oocyte meiosis	0.00156809	0.0415543	0.0396148	6790/991/9232	3
Treat31		Paclitaxel 2			Positive controls	Endocytosis	0.0311611	0.0311611	NA	254122	1
Treat35		Cabozantinib			Positive controls	Aminoacyl-tRNA biosynthesis	0.00816125	0.00816125	NA	4579	1
Treat37		Lenvatinib			Positive controls	Inflammatory mediator regulation of TRP channels	0.00141949	0.0425846	0.0373549	5608/5732	2
Treat38		Docetaxel			Positive controls	mRNA surveillance pathway	0.0119946	0.0229999	NA	7919	1
Treat91		Viborelbine			Positive controls	Amyotrophic lateral sclerosis	0.0450105	0.0450105	NA	400916	1
Treat1	No pathway
Treat2	No pathway
Treat3	No pathway
Treat5	No pathway
Treat6	No pathway
Treat8	No pathway
Treat9	No pathway
Treat10	No pathway
Treat12	No pathway
Treat29	No pathway
Treat30	No pathway
Treat32	No pathway
Treat33	No pathway
Treat42	No pathway
Treat43	No pathway
Treat45	No pathway
Treat46	No pathway
Treat47	No pathway
Treat53	No pathway
Treat54	No pathway
Treat55	No pathway
Treat57	No pathway
Treat62	No pathway
Treat81	No pathway
Treat85	No pathway
Treat87	No pathway
Treat89	No pathway
Treat92	No pathway
